# Supplementary material
Source: PubMed Central journal article supplement (PMC4652211)
Supplement: Supp_Fig1.pdf [file Supp_Fig1.pdf]

## Supplementary Data

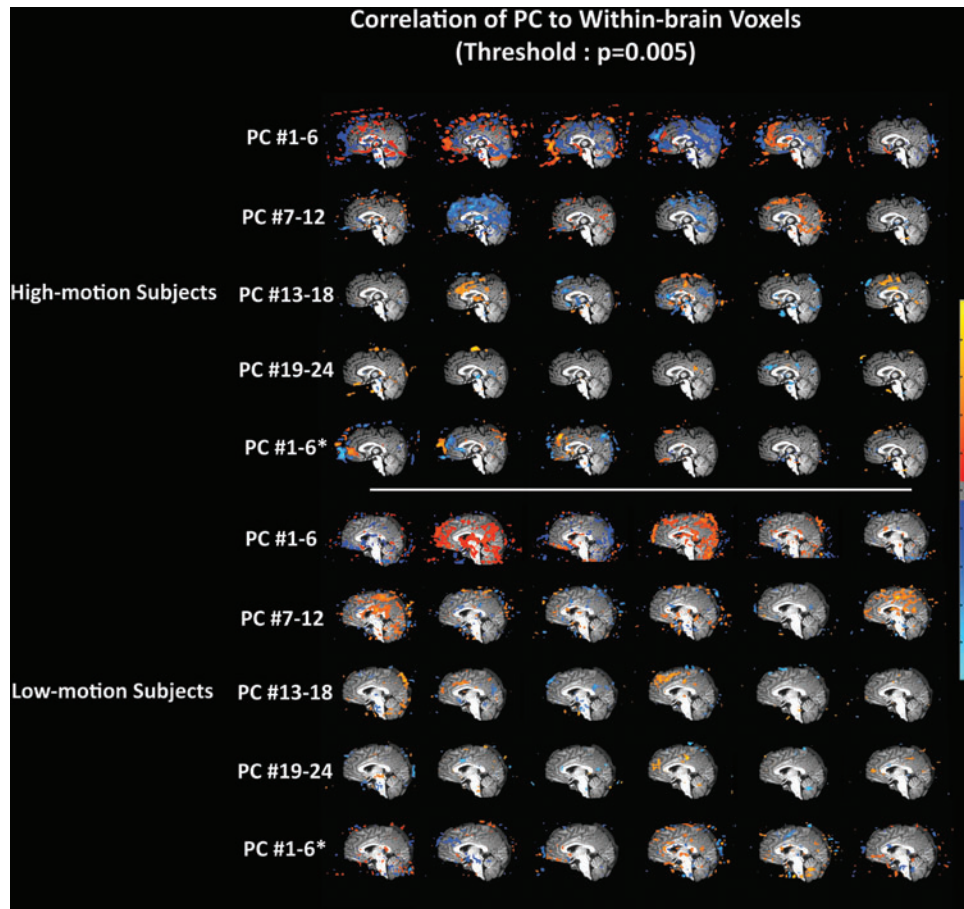

**SUPPLEMENTARY FIG. S1.** Spatial distribution of areas significantly correlated with the principal components (PCs). The PCs were correlated to each voxel time series for each of the motion correction methods. The maps were thresholded at  $p=0.005$ . \* indicates PCs derived after  $\delta_{mot}$  and used in the  $\delta_{mot\delta edge}^*$  model.
