# Supplementary material
Source: PubMed Central journal article supplement (PMC4652211)
Supplement: Supp_Fig2.pdf [file Supp_Fig2.pdf]

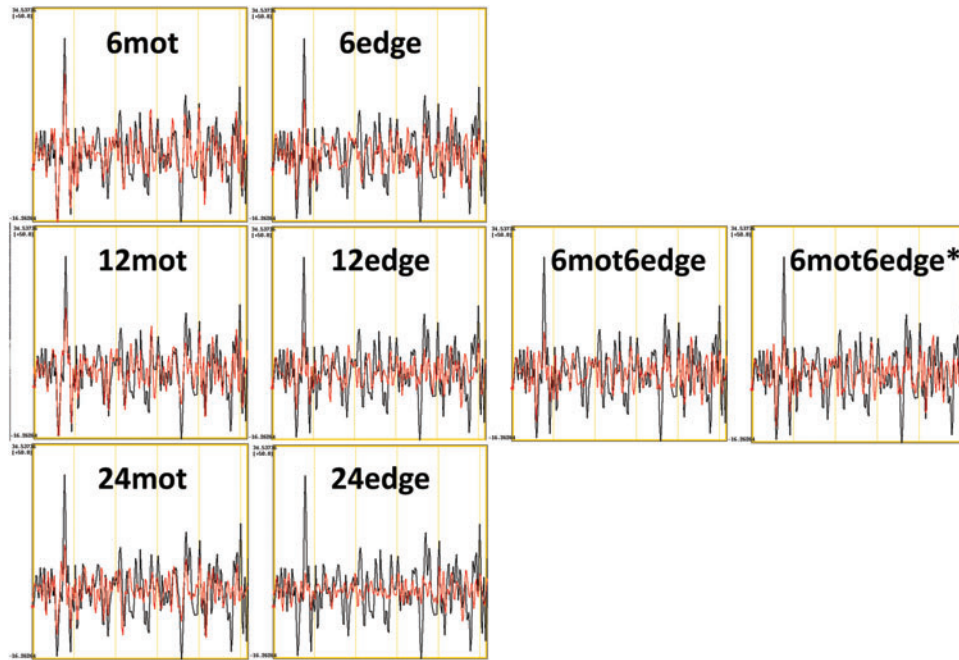

**SUPPLEMENTARY FIG. S2.** Overlay time series obtained after each motion correction (red) on top of nonmotion corrected time series (black) for a medial prefrontal cortex voxel. The black line represents time series for which only white matter and CSF nuisance regressors were regressed out. The red lines represent the motion corrected time series.
