# Supplementary material
Source: PubMed Central journal article supplement (PMC4652211)
Supplement: Supp_Fig3.pdf [file Supp_Fig3.pdf]

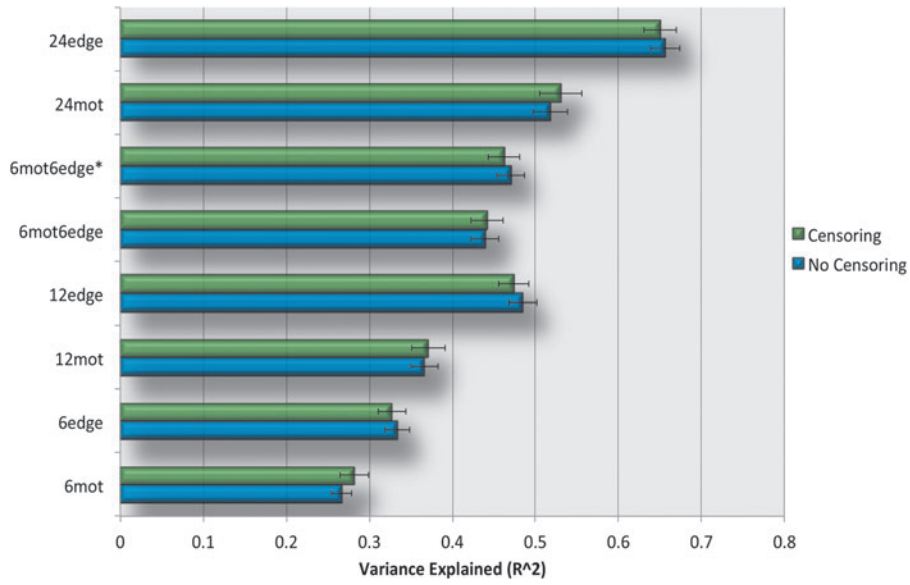

**SUPPLEMENTARY FIG. S3.** Variance explained ( $R^2$ ) by each of the nuisance regressor sets when GSR was used. For each method, the top bar (green) shows the variance explained by the different motion regression models when censoring was not used; the bottom bar (blue) shows the variance explained by the different motion regression models when not used and was used. Error bars in the graphs represent the standard error of the mean.
