# Supplementary material
Source: PubMed Central journal article supplement (PMC4652211)
Supplement: Supp_Fig4.pdf [file Supp_Fig4.pdf]

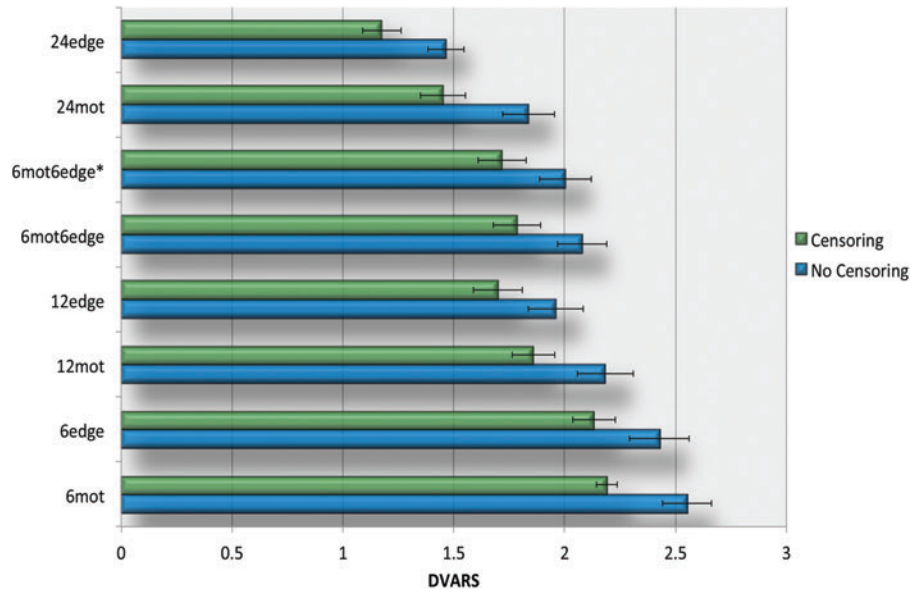

**SUPPLEMENTARY FIG. S4.** DVARS results when GSR was used. For each regressor set, the top bar (green) shows the DVARS for the different motion regression models when censoring was not used; the bottom bar (blue) shows the DVARS for the different motion regression models when censoring was used. Error bars in the graphs represent the standard error of the mean. The results shown here were obtained with the use of GSR.
