# Supplementary material
Source: PubMed Central journal article supplement (PMC4652211)
Supplement: Supp_Fig5.pdf [file Supp_Fig5.pdf]

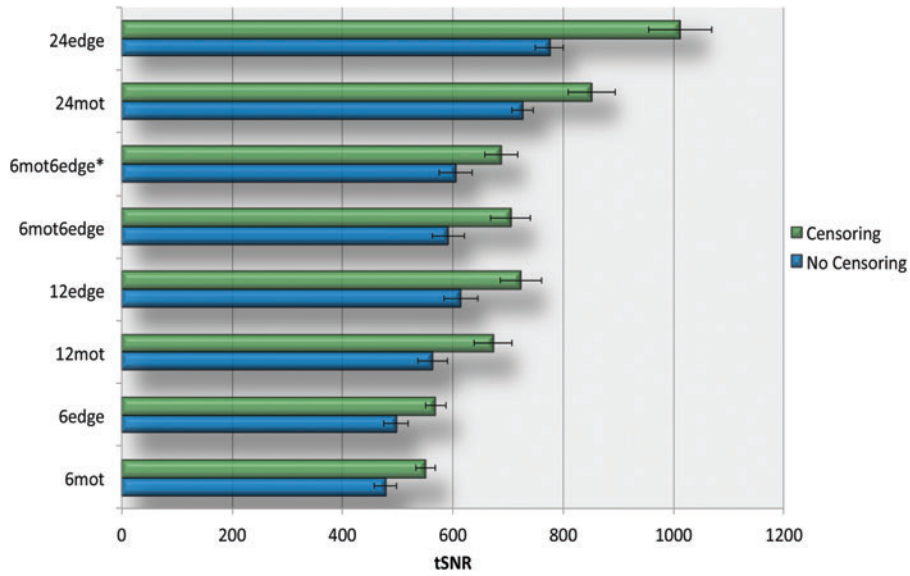

**SUPPLEMENTARY FIG. S5.** tSNR results when GSR was used. For each regressor set, the top bar (green) shows the tSNR for the different motion regression models when censoring was not used; the bottom bar (blue) shows the tSNR for the different motion regression models when censoring was used. Error bars in the graphs represent the standard error of the mean.
