# Supplementary material
Source: PubMed Central journal article supplement (PMC4652211)
Supplement: Supp_Fig6.pdf [file Supp_Fig6.pdf]

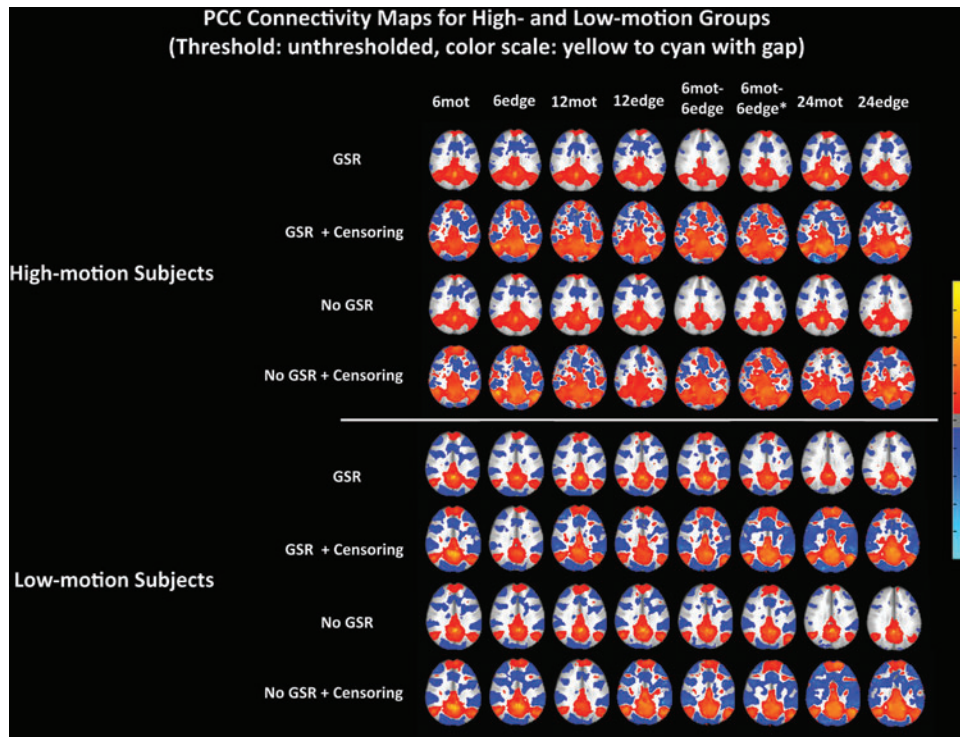

**SUPPLEMENTARY FIG. S6.** High- and low-motion group PCC connectivity maps for each motion correction. The  $p$ -value thresholds were varied for each map to illustrate the relative similarity or difference in the spatial pattern of default mode network connectivity.
